# Supplementary material
Source: publisher site journal article supplement (https://www.dovepress.com/article/434640)
Supplement: Supplementary file 1 [file get_supplementary_file.php]

|                                         | <b>Samples<br/>(N = 39)</b> |
|-----------------------------------------|-----------------------------|
| Age (yr) – mean ± SD                    | 57.9 ± 9.7                  |
| Diagnosed with HIV (yr) - mean ± SD     | 22.3 ± 8.7                  |
|                                         | % of samples                |
| Sex                                     |                             |
| Male                                    | 81.6                        |
| Female                                  | 18.4                        |
| Race                                    |                             |
| African American                        | 36.8                        |
| Native Hawaiian or Other Pacific Island | 2.6                         |
| American Indian or Alaska Native        | 2.6                         |
| White/Anglo                             | 55.3                        |
| Other                                   | 5.3                         |
| Marital status                          |                             |
| Married                                 | 36.9                        |
| Widowed                                 | 2.6                         |
| Single                                  | 52.6                        |
| Divorced                                | 7.9                         |
| Insurance                               |                             |
| Yes                                     | 89.5                        |
| No                                      | 10.5                        |
| Income                                  |                             |
| >\$100,000                              | 26.3                        |
| \$75,000 to \$99,999                    | 5.3                         |
| \$50,000 to \$74,999                    | 7.9                         |
| \$35,000 to \$49,999                    | 5.3                         |
| \$20,000 to \$34,999                    | 26.3                        |
| < \$20,000                              | 21.1                        |
| I'd prefer not to say/ NA               | 7.9                         |
| Cardiovascular diseases                 |                             |
| Acute coronary syndrome                 | 2.6                         |
| Myocardial infarction                   | 5.3                         |
| Stroke                                  | 2.6                         |
| Peripheral vascular disease             | 2.6                         |
| Cerebrovascular disease                 | 5.3                         |
| Coronary heart disease                  | 10.5                        |
| Smoking status                          |                             |
| Yes                                     | 10.5                        |
| No                                      | 89.5                        |

Appendix A: Characteristics of pilot study participants at the Duke University Medical Center (N=39)

## **Appendix B: Double-Bounded Dichotomous Contingent-Response Questions**

Hanemann M, John Loomis, and Barbara Kanninen. . Statistical efficiency of double-bounded dichotomous choice contingent valuation. *American journal of agricultural economics* 1991;73.4 1255-1263.

### **Efficacy of antihypertensive**

There are many reasons why people miss or skip doses of their medicines. I would like to ask you some questions about your own experiences with high blood pressure medication and or cholesterol medication and situations in which people might skip doses of these medicines. There are no right or wrong answers, and your answers will remain confidential.

Do you think missing your medicine for high-blood pressure once a week (equivalent to 52 times a year), would increase your chance of having a heart attack or a stroke?

- 1 Yes
- 2 No
- 3 Do not know

*If yes, ask about missing once a month if no or do not know, ask about missing twice a week.*

How about missing the same medicine once a month (equivalent to 12 times a year)?

- 1 Yes
- 2 No
- 3 Do not know

How about missing the same medicine twice a week (equivalent to 104 times a year)?

- 1 Yes
- 2 No
- 3 Do not know

### **Side effects of antihypertensive**

There are many reasons why people miss or skip doses of their medicines. Some skip their medications due to medications side effects. I would like to ask you some questions on this topic and as before, there are no right or wrong answers and your answers will remain confidential.

Do you think missing your medicine for high-blood pressure once a week (equivalent to 52 times a year), would reduce the intensity of side effects (e.g. frequent visits to the toilet or sexual performance) that you experience when on the medication?

- 1 Yes
- 2 No
- 3 Do not know

*If yes, ask about missing once a month if no or do not know, ask about missing twice a week.*

How about missing the same medicine once a month (equivalent to 12 times a year)?

1 Yes

2 No

3 Do not know

How about missing the same medicine twice a week (equivalent to 104 times a year)?

1 Yes

2 No

3 Do not know
